# Supplementary material for: A systematic analysis of atomic protein–ligand interactions in the PDB
Source: Medchemcomm. 2017 Sep 26;8(10):1970–81. doi: 10.1039/c7md00381a (PMC5708362; doi:10.1039/c7md00381a)
Supplement: Supplementary file 2 [file MD-008-C7MD00381A-s002.xlsx]

## Sheet: Sheet1
rank	number of atomic interactions	MMFF type of ligand atom	ICM type of ligand atom	MMFF type of covalent neighbours of ligand atom	ICM type of covalent neighbours of ligand atom	MMFF type of protein atom	ICM type of protein atom	MMFF type of covalent neighbours of protein atom	ICM type of covalent neighbours of protein atom	Distance (Å)
1	20174	37	125	37,37	124125	1	111	1	112	3.99905
3	16753	37	125	37,37	124125	7	81	3	121	3.24642
2	16057	37	125	37,37	124125	37	125	37,37	124125	3.99707
5	7516	37	125	37,37	124125	3	121	1,10,7	113,211,81	3.6884
6	6768	37	125	37,37	125125	10	211	1,3	113121	3.91573
4	6726	37	125	37,37	125125	1	112	1,1	111113	3.95466
7	5948	6	60	1	113	32	71	41	127	3.23844
8	4756	1	112	1,1	113113	37	125	37,37	125125	3.61209
9	4749	7	81	3	121	3	121	1,10,7	113,211,81	3.49149
10	4622	37	125	37,37	124125	1	113	1,3,10	111121211	3.84147
13	4343	7	82	3	123	1	113	1,3,10	113121211	3.88313
11	4307	7	82	3	123	7	81	3	121	3.55469
12	4178	37	125	37,37	124124	32	71	41	127	3.56607
16	4096	7	82	3	123	10	211	1,3	113121	3.2293
14	4078	1	112	1,1	110112	7	81	3	121	3.45201
18	3909	1	113	1,1,6	113,113,60	32	71	41	127	3.40872
15	3785	1	112	1,1	110112	1	111	1	113	3.98631
19	3511	7	82	3	123	1	111	1	113	3.71099
20	3506	7	81	3	121	37	125	37,37	124125	3.46052
17	3502	1	111	1	110	1	111	1	113	3.84355
22	3338	37	125	37,37	125125	1	112	3,10	121211	3.69512
23	3211	32	71	41	127	56	232	57	103	2.57218
21	3033	37	125	37,37	124125	6	63	1	112	3.41673
25	2931	6	60	1	113	41	127	1,32,32	112,71,71	3.33078
28	2766	6	60	1	112	3	121	1,10,7	112,211,81	3.95543
26	2752	6	60	1	113	7	84	3	122	3.43748
24	2604	1	111	1	110	7	81	3	121	2.97491
31	2466	32	71	41	127	10	211	1,3	113121	3.27331
27	2401	1	111	1	110	37	125	37,37	124125	3.58952
32	2273	32	71	41	127	1	113	1,3,10	112121211	3.48801
34	2213	32	71	41	127	3	121	1,10,7	113,211,81	3.72152
29	2212	38	223	37,37	124125	1	111	1	113	3.49637
30	2202	37	125	37,37	124125	6	62	37	124	3.97521
36	2081	6	60	1	113	37	125	37,37	124125	3.48421
37	1982	10	211	1,3	112121	7	81	3	121	2.78482
35	1862	7	81	3	121	1	112	1,1	112112	3.76445
45	1857	32	73	18	250	1	111	1	113	3.47117
41	1841	32	71	41	127	37	125	37,37	124125	3.42499
38	1836	6	60	1	113	10	211	1,3	113121	2.9929
33	1813	37	125	37,37	124124	37	124	1,37,37	112125125	3.90603
42	1782	37	125	37,37	124125	56	232	57	103	3.6982
39	1768	37	125	37,37	124125	1	111	15	253	3.81893
47	1671	32	71	41	127	1	111	1	113	3.68155
50	1670	32	73	18	250	10	211	1,3	113121	3.77681
56	1624	7	81	3	121	1	112	3,10	121211	3.92938
40	1621	38	223	37,37	124124	7	81	3	121	3.84662
44	1620	37	125	37,37	124124	1	112	1,37	113124	3.73632
62	1612	32	71	41	127	57	103	56,56,56	232232232	3.20576
52	1605	6	60	1	112	1	111	1	113	3.65978
43	1584	1	112	1,1	112113	32	71	41	127	3.32307
64	1576	32	71	41	127	1	112	1,1	113113	3.3949
48	1574	37	125	37,37	124124	10	212	3	122	3.50932
46	1572	11	90	1	110	1	111	1	113	3.50802
54	1545	7	81	3	121	32	71	41	127	3.59702
59	1513	32	71	41	127	6	63	1	112	3.65287
51	1503	3	121	1,10,7	112,191,81	7	81	3	121	3.7355
72	1493	11	90	37	124	1	111	1	113	3.96933
73	1486	32	73	18	250	3	122	1,10,7	112,212,84	3.95808
63	1471	38	223	37,37	124124	1	113	1,3,10	112121211	3.75931
66	1457	6	60	1	113	1	113	1,3,10	112121211	3.39212
71	1422	1	112	1,6	112,65	7	84	3	122	3.13225
55	1399	12	92	37	124	1	111	1	113	3.70632
58	1394	37	125	37,38	125223	1	111	1	113	3.61295
67	1391	7	81	3	121	6	63	1	112	2.74756
68	1384	37	124	37,37,6	124,125,62	1	111	1	113	3.90089
80	1375	7	81	3	121	10	212	3	122	3.67495
90	1372	38	223	37,37	124124	3	121	1,10,7	113,211,81	3.92018
57	1364	1	112	1,34	113231	32	71	41	127	3.72625
81	1361	32	73	18	250	1	113	1,3,10	111121211	3.59111
49	1349	37	125	37,37	124125	37	124	37,37,6	125,125,62	3.67741
61	1330	37	125	37,37	124125	1	112	1,41	113127	3.31803
74	1323	37	124	1,37,37	112125125	1	111	1	113	3.96558
53	1289	37	125	37,37	125125	1	113	1,1,1	111111113	3.44762
78	1289	37	125	37,37	124125	15	253	1,1	111112	3.97214
77	1277	1	112	1,6	112,65	37	125	37,37	124125	3.65984
76	1274	37	125	37,37	124125	41	127	1,32,32	112,71,71	3.85951
105	1271	1	112	1,1	112113	10	211	1,3	113121	3.81574
70	1259	37	124	1,37,37	110124125	37	125	37,37	124125	3.90044
83	1259	37	125	37,37	125125	39	215	63,63	126126	3.61452
69	1241	32	71	41	127	7	81	3	121	3.43346
82	1228	37	125	37,38	124223	7	81	3	121	3.01084
75	1221	37	124	37,37,6	125,125,59	37	125	37,37	125125	3.71466
92	1220	37	125	37,37	124125	63	126	39,66	215222	3.37475
86	1193	1	112	1,1	112112	3	122	1,10,7	112,212,84	3.83618
85	1188	32	73	18	250	1	112	1,1	112113	3.79569
91	1144	1	113	1,1,6	112,113,60	7	81	3	121	3.4886
100	1137	6	60	1	113	56	232	57	103	3.28292
84	1109	12	92	37	124	37	125	37,37	124125	3.69396
102	1109	32	73	18	250	37	125	37,37	124125	3.6512
60	1089	38	223	37,37	124125	37	125	37,37	124125	3.62752
88	1087	1	113	1,34	112231	7	81	3	121	3.94247
101	1081	6	60	1	113	10	212	3	122	3.17016
96	1069	1	112	1,1	112113	6	62	37	124	3.89207
103	1064	1	112	1,6	113,60	32	71	41	127	3.45914
97	1037	1	111	6	59	7	84	3	122	3.46337
95	1032	40	224	37	124	7	81	3	121	3.00937
94	1019	1	111	1	113	3	121	1,10,7	113,211,81	3.84155
104	1003	34	231	1	112	32	71	41	127	2.76627
106	947	1	113	1,1,6	112,113,65	37	125	37,37	125125	3.77365
